# Supplementary material
Source: publisher site journal article supplement (https://www.spandidos-publications.com/8132/downloadSupplementary)
Supplement: Supplementary file 1 [file downloadSupplementary]

**Table S1.** Sample information of five datasets

| <b>Dataset</b> | <b>TCGA-PRAD</b> |            | <b>GSE103512</b> |            | <b>GSE21034</b> |     | <b>GSE70770</b> |            | <b>GSE54460</b> |     |
|----------------|------------------|------------|------------------|------------|-----------------|-----|-----------------|------------|-----------------|-----|
| Groups         | Control          | PCa        | Control          | PCa        | Control         | PCa | Control         | PCa        | Control         | PCa |
| Number         | 51               | 481        | 7                | 60         | 29              | 150 | 74              | 219        | 0               | 96  |
| Age            | 61.00±7.35       | 61.00±6.85 | NA               | 64.00±6.49 | NA              | NA  | 65              | 62.00±7.97 | NA              | NA  |
| Sex            | 0                |            |                  |            |                 |     |                 |            |                 |     |
| Male           | 51               | 481        | NA               | 50         | NA              | NA  | NA              | NA         | NA              | NA  |
| Female         | 0                | 0          | NA               | 0          | NA              | NA  | NA              | NA         | NA              | NA  |
| Unknown        | 0                | 0          | NA               | 10         | NA              | NA  | NA              | NA         | NA              | NA  |

**Table SII.** List of primers used in reverse-transcription-quantitative PCR.

| <b>Primer name</b> | <b>Sequence</b>                    |
|--------------------|------------------------------------|
| H-GAPDH            | F:5'-AGTCCACTGGCGTCTTCACC-3'       |
|                    | R:5'-TGATCTTGAGGCTGTTGTCATACTTC-3' |
| H-RMI1             | F:5'-GTCAGCCTGCATACTCCCAGATAC-3'   |
|                    | R:5'-GCAGCATCAACATTCGTGAAGGC-3'    |

**Table SIII.** The targeted sequences of shRNA and the shNC sequence.

| <b>Gene symbol</b> | <b>Targeted sequence</b> |
|--------------------|--------------------------|
| RMI1-shRNA-1       | CGATCGAAGTATAGAGAGATT    |
| RMI1-shRNA-2       | GAACCATCAAACCTATCTATA    |
| RMI1-shRNA-3       | GCATATCTAGATGTAGACTTT    |
| shNC               | TTCTCCGAACGTGTCACGT      |

sh, short hairpin; NC, negative control.
